# Supplementary material for: Faces Do Not Attract More Attention Than Non-Social Distractors in the Stroop Task
Source: Oxford University Press journal article supplement (doi:10.1525/collabra.18521), 2021-01-01
Supplement: collabra_2021_7_1_18521_49494.docx [file collabra_2021_7_1_18521_49494.docx]

**Pre-processing of Response Times.**

Table S3.1 lists the number of remaining trials per experimental condition after applying our pre-registered trimming criterion in Experiment 1. Table S3.2 depicts the mean reaction times using our pre-registered standard deviation criterion and Figure S3.1 and S3.2 depict density plots of the response times for each of the pre-processing methods. Applying the suggested standard deviation per participant criterion resulted in overall slower reaction times (Table S3.3), compared to the original analysis (Table S3.2). As the pattern of results nonetheless looks similar to what we originally reported, and in the interest of adhering to our pre-registration, we decided to keep the current results section of Experiment 1 as it is.

| **Table S3.1. Experiment 1: Number of remaining trials per experimental condition after reaction time trimming using the pre-registered standard deviation criterion. 192 trials, 39 participants.** | | | |
| --- | --- | --- | --- |
| **Condition** | **Total number of trials** | **Trials remaining** | **% of trials remaining** |
| incongruent_human | 936 | 847 | 90.5 |
| incongruent_robot | 936 | 835 | 89.2 |
| incongruent_object | 936 | 857 | 91.6 |
| incongruent_flower | 936 | 829 | 88.6 |
| neutral_human | 936 | 883 | 94.3 |
| neutral_robot | 936 | 870 | 92.9 |
| neutral_object | 936 | 883 | 94.3 |
| neutral_flower | 936 | 878 | 93.8 |


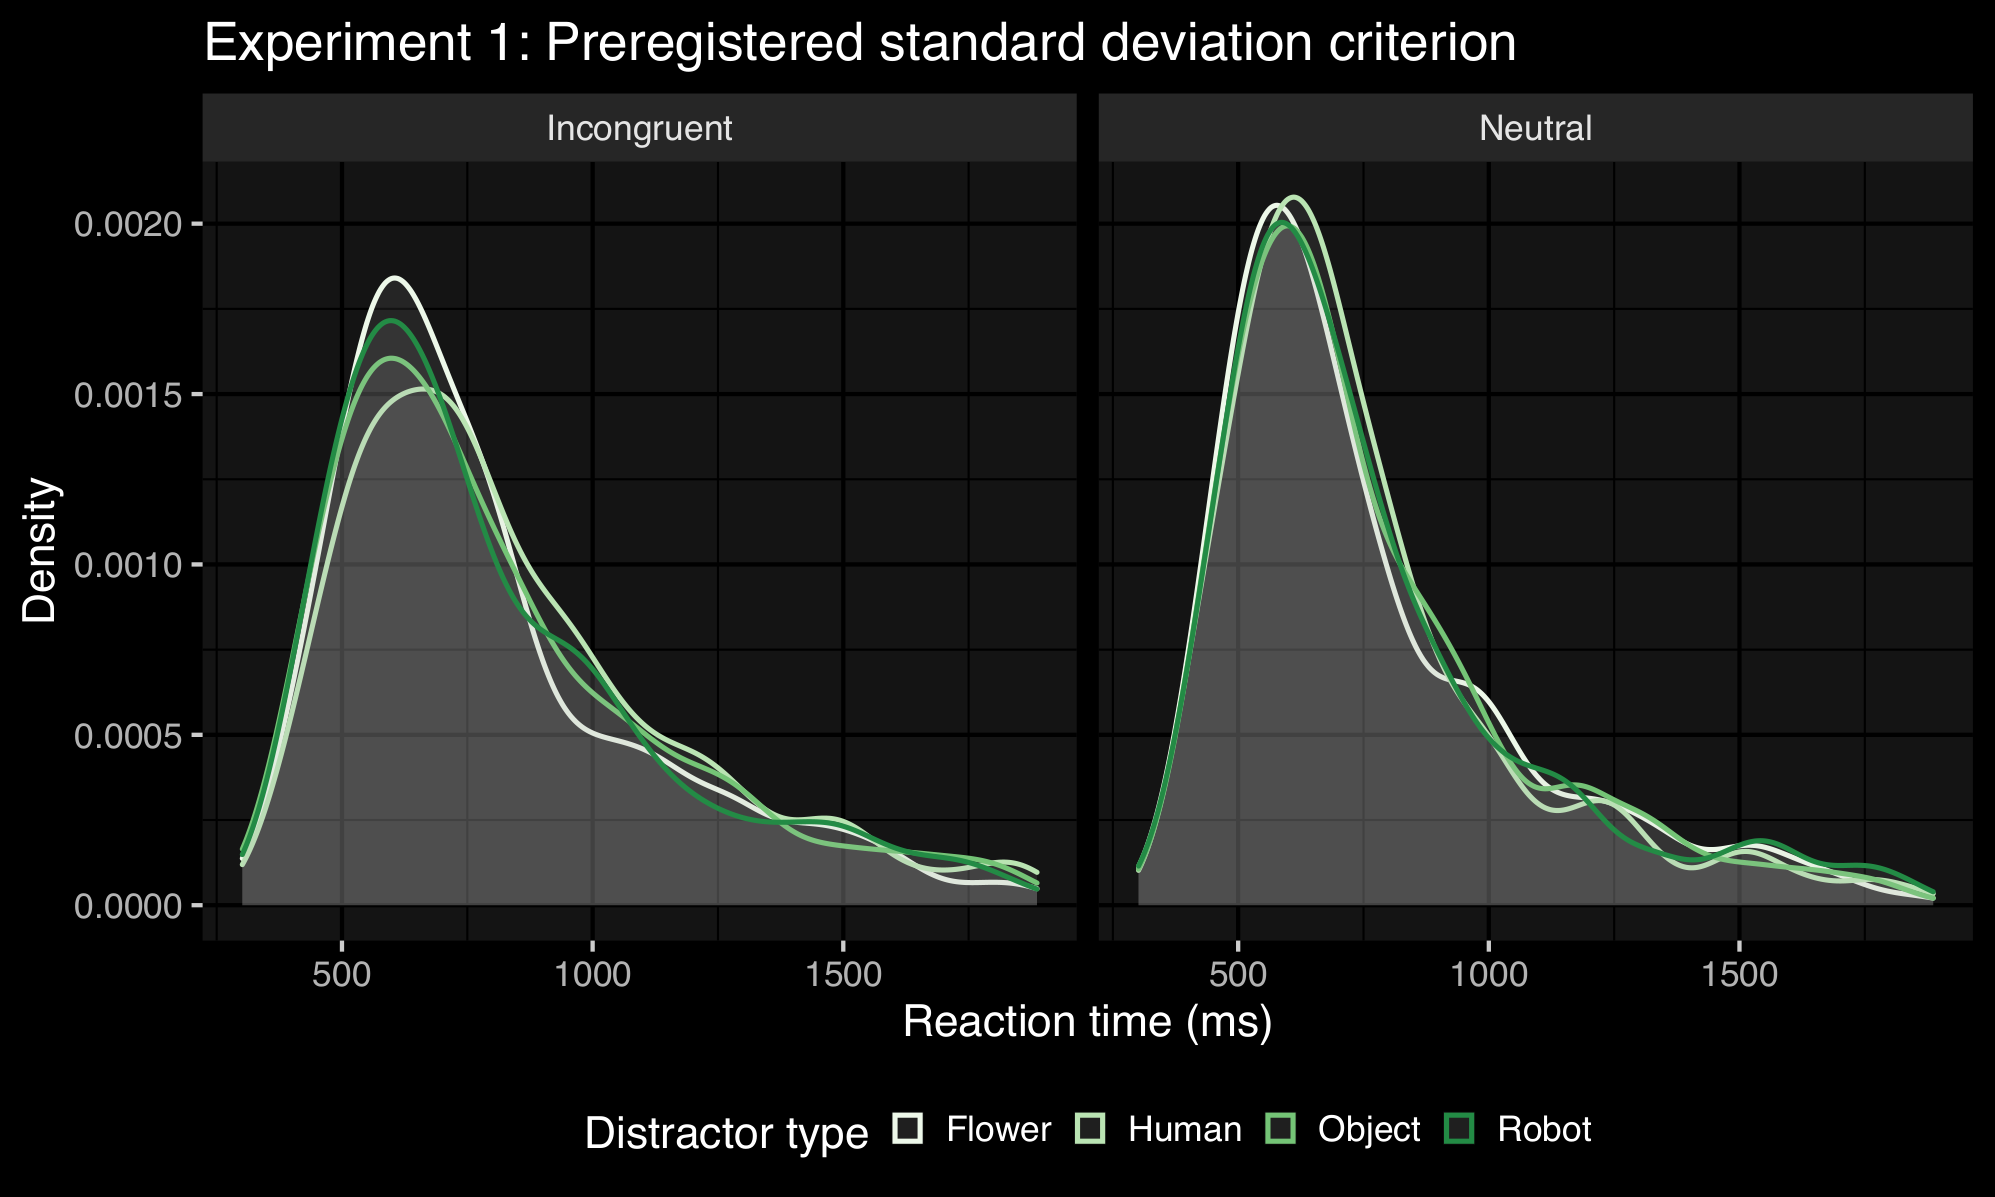


Figure S3.1. Density plots for reaction times (ms) in Experiment 1 with the pre-registered standard deviation trimming criterion.

| **Table S3.2. Experiment 1: Mean reaction times (in ms) per condition using the pre-registered standard deviation criterion.** | | | | |
| --- | --- | --- | --- | --- |
|  | Distractor | | | |
|  | Human | Robot | Object | Flower |
| Incongruent target | 843 | 807 | 815 | 796 |
| Neutral target | 753 | 768 | 763 | 760 |

| **Table S3.3. Experiment 1: Mean reaction times (in ms) per condition using the standard deviation per participant criterion.** | | | | |
| --- | --- | --- | --- | --- |
|  | Distractor | | | |
|  | Human | Robot | Object | Flower |
| Incongruent target | 840 | 833 | 833 | 809 |
| Neutral target | 769 | 770 | 780 | 776 |


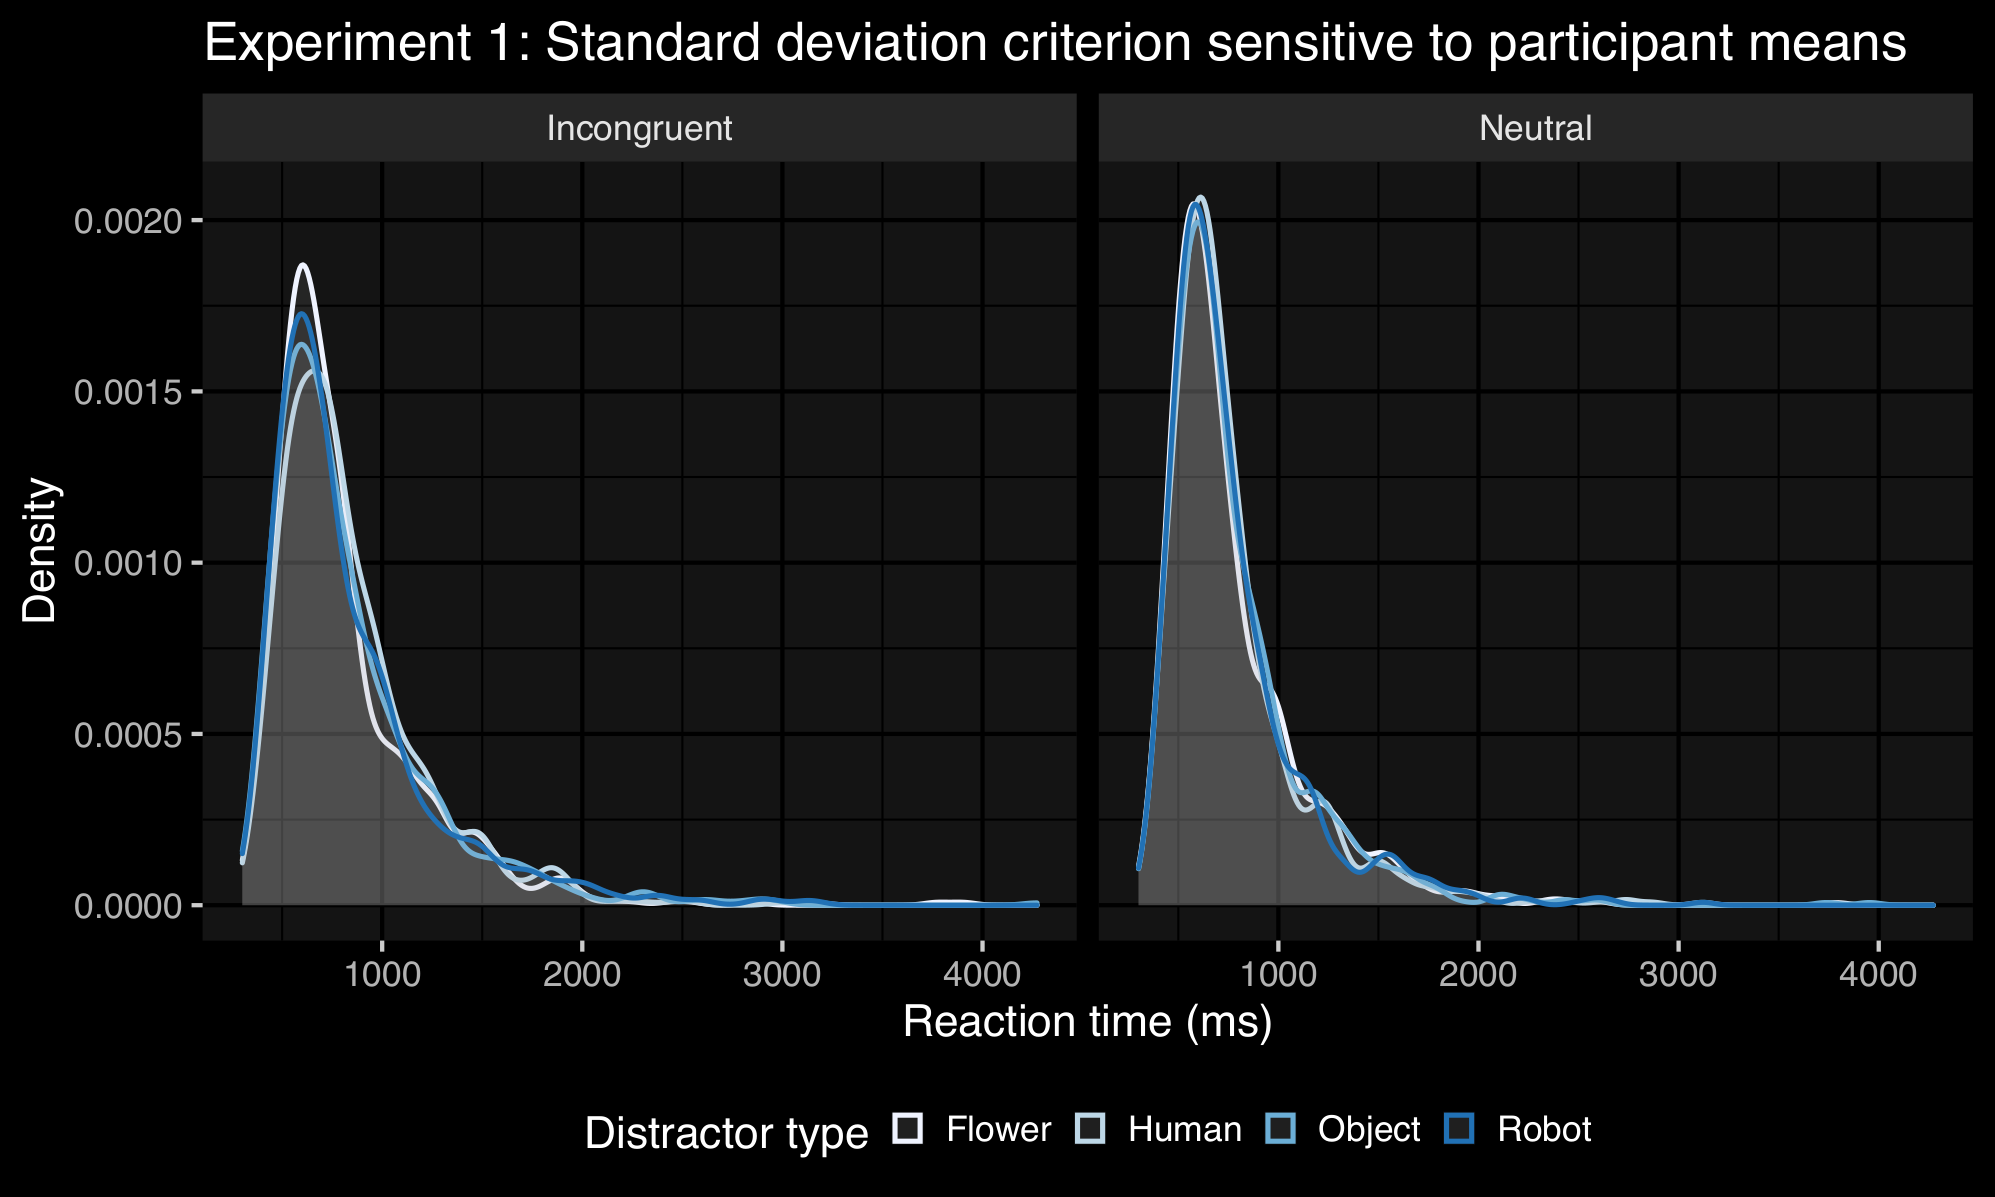


Figure S3.2. Density plots for reaction times (ms) in Experiment 1 with the participant-sensitive standard deviation trimming criterion.

Repeating the same procedure for Experiment 2, we find that with our pre-registered standard deviation criterion we discard 1061 trials (10.84%) in total (with the participant sensitive criterion we discard 11.35% of all trials). Again, we see that the overall patterns of results remain the same across these two pre-processing methods (illustrated in tables and figures below).

| **Table S3.4. Experiment 2: Number of remaining trials per experimental condition after reaction time trimming using the pre-registered standard deviation criterion. 192 trials, 51 participants.** | | | |
| --- | --- | --- | --- |
| **Condition** | **Total number of trials** | **Trials remaining** | **% of trials remaining** |
| incongruent_human | 1,224 | 1062 | 86.8 |
| incongruent_robot | 1,224 | 1072 | 87.6 |
| incongruent_object | 1,224 | 1061 | 86.7 |
| incongruent_flower | 1,224 | 1056 | 86.3 |
| neutral_human | 1,224 | 1120 | 91.5 |
| neutral_robot | 1,224 | 1100 | 89.9 |
| neutral_object | 1,224 | 1109 | 90.6 |
| neutral_flower | 1,224 | 1101 | 90.0 |

| **Table S3.5. Experiment 2: Mean reaction times (in ms) per condition using the pre-registered standard deviation criterion (Experiment 2).** | | | | |
| --- | --- | --- | --- | --- |
|  | Distractor | | | |
|  | Human | Robot | Object | Flower |
| Incongruent target | 811 | 808 | 809 | 816 |
| Neutral target | 723 | 747 | 730 | 735 |


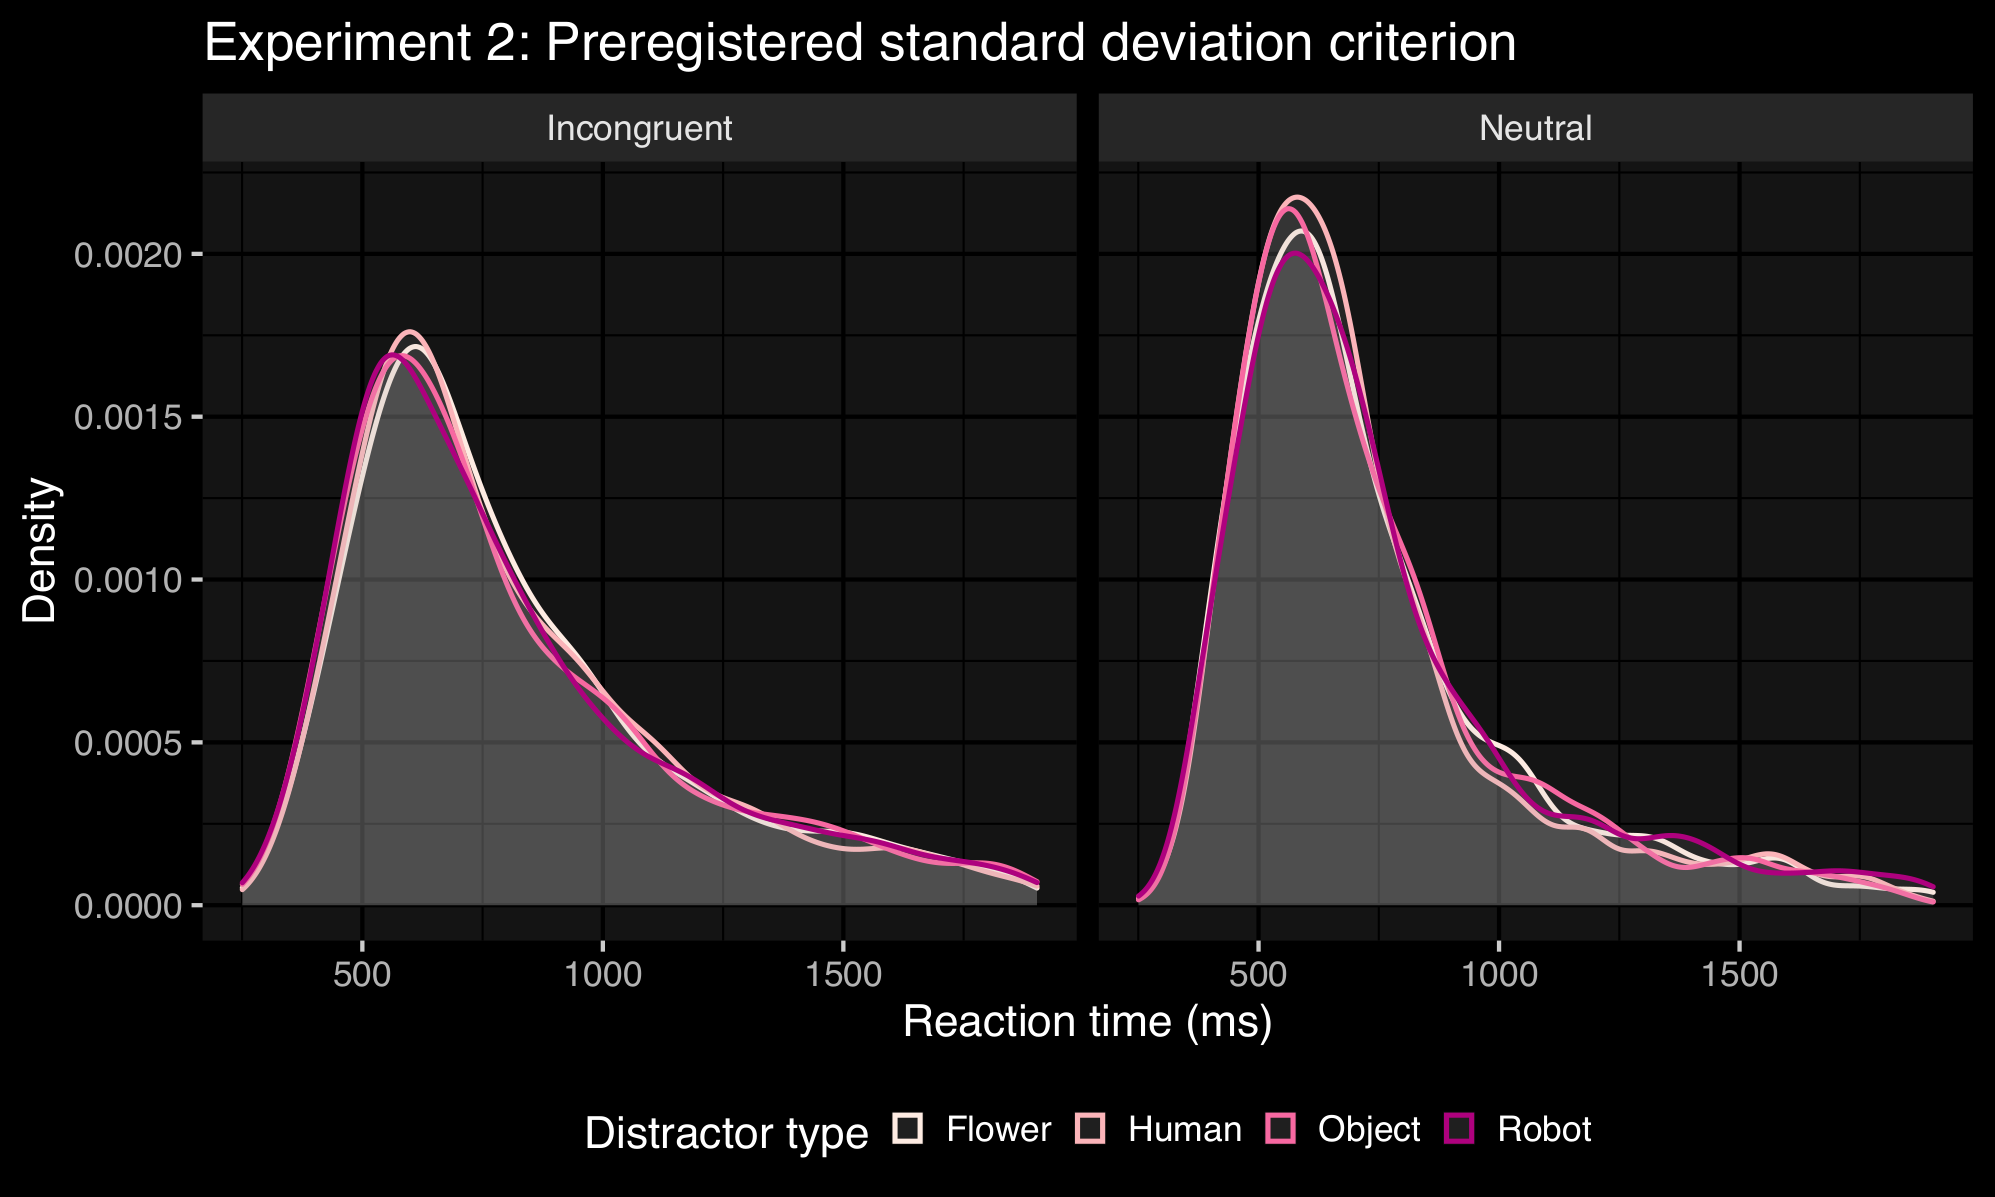


Figure S3.3. Density plots for reaction times (ms) in Experiment 2 with the pre-registered standard deviation trimming criterion.

| **Table S3.6. Experiment 2: Mean reaction times (in ms) per condition using the standard deviation per participant criterion.** | | | | |
| --- | --- | --- | --- | --- |
|  | Distractor | | | |
|  | Human | Robot | Object | Flower |
| Incongruent target | 833 | 828 | 834 | 825 |
| Neutral target | 748 | 755 | 750 | 749 |


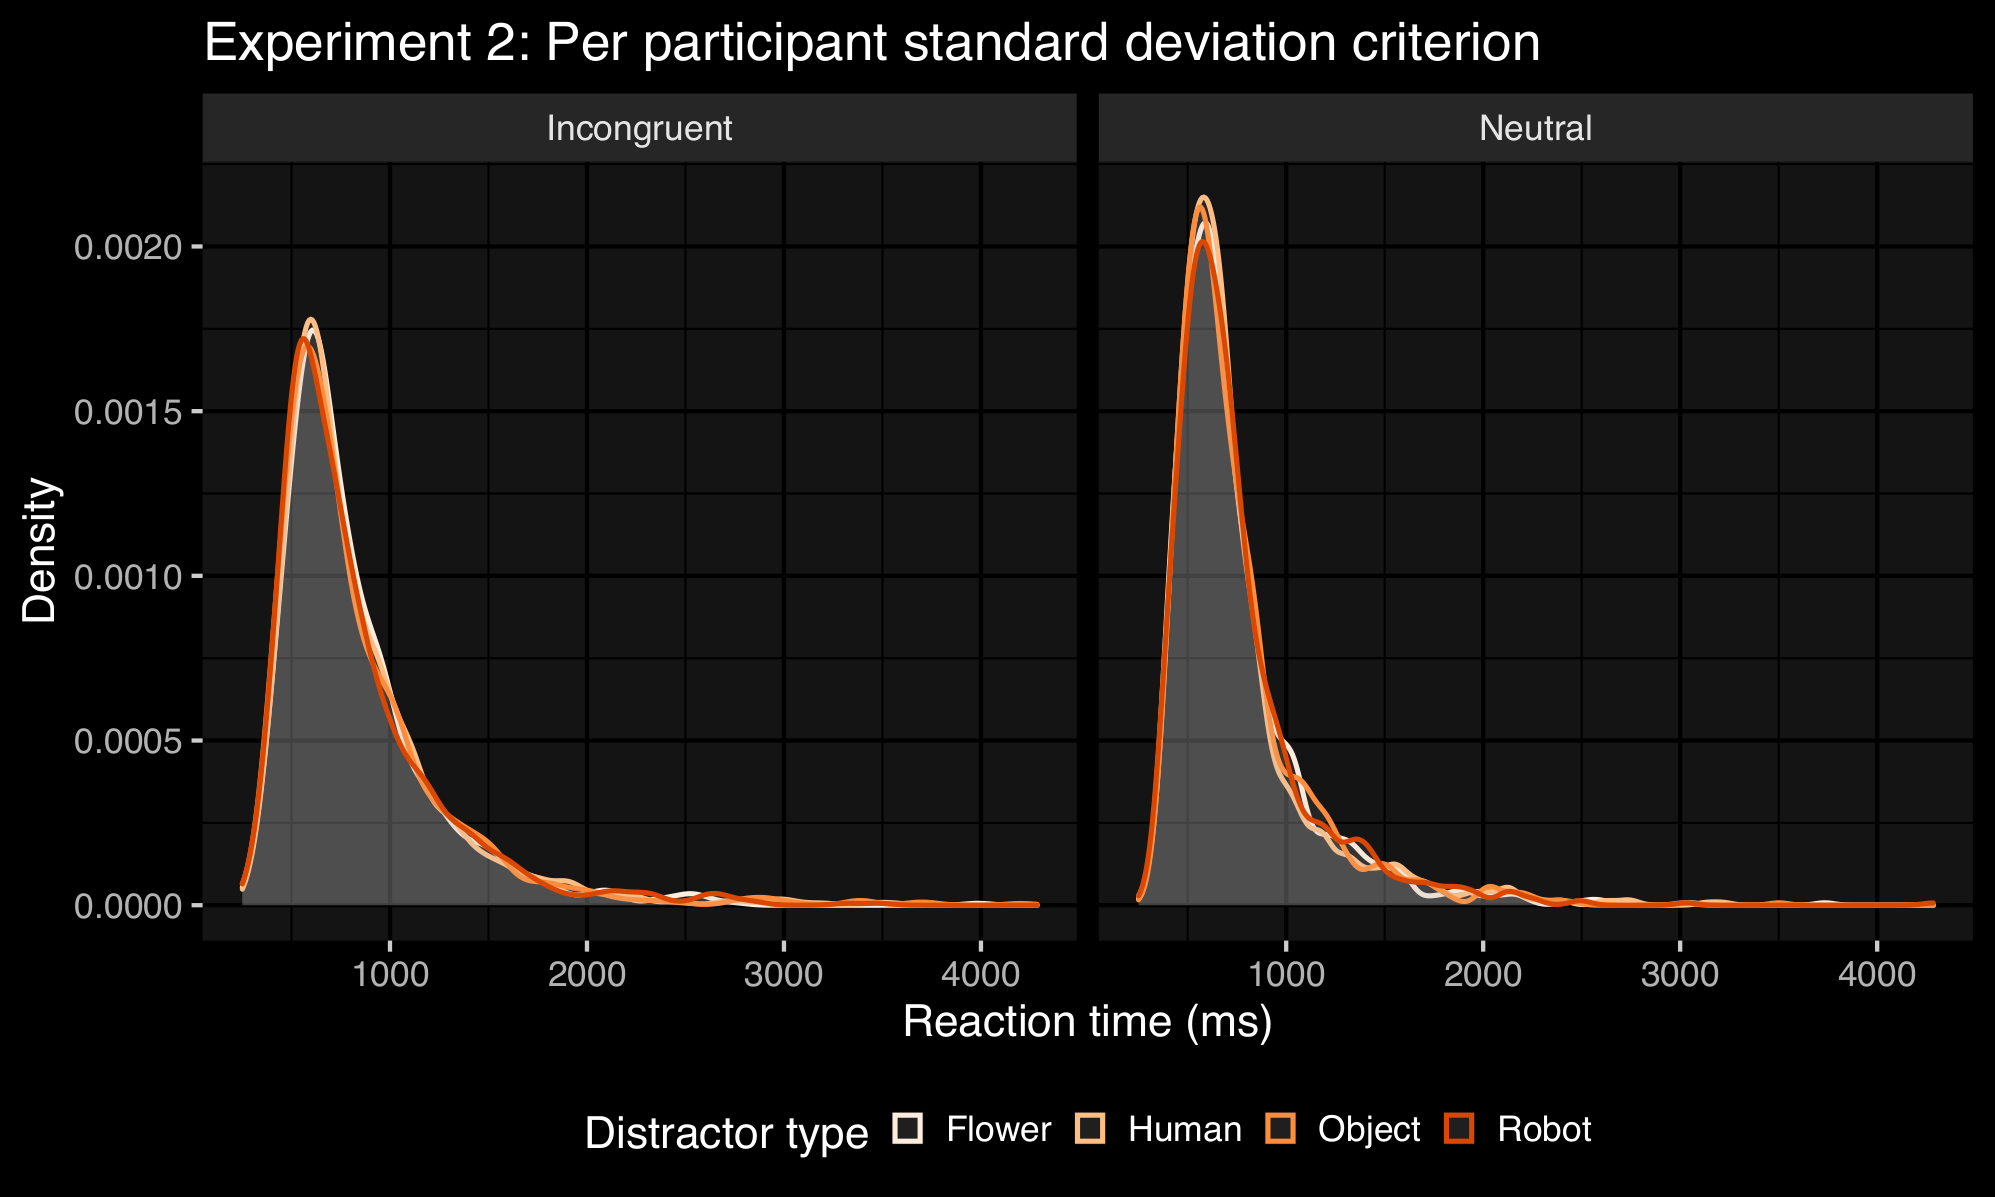


Figure S3.4. Density plots for reaction times (ms) in Experiment 2 with the per participant standard deviation trimming criterion.
